# Supplementary material for: Metabolic Network Topology Reveals Transcriptional Regulatory Signatures of Type 2 Diabetes
Source: PLoS Comput Biol. 2010 Apr 1;6(4):e1000729. doi: 10.1371/journal.pcbi.1000729 (PMC2848542; doi:10.1371/journal.pcbi.1000729)
Supplement: Table S3 — Reporter metabolites for Mexican-American dataset (Recon1). (0.03 MB XLS) [file pcbi.1000729.s004.xls]

## Sheet: Recon1_Mexican_dataset
			P-values (in bold only < 0.05)		Enzyme neighbors (Up-regulated : Down-regulated ratio)
KEGG ID	Metabolite ID	FullName	T2DM/FH-	FH-/FH+	UD T2DM/FH-	UD FH+/FH-
C00026	akg[m]	2-Oxoglutarate	0.00136333	0.00050536	7:2	7:2
C00322	2oxoadp[m]	2-Oxoadipate	0.00158856	0.00212563	1:0	1:0
C00080	h[m]	H+	0.00626915	0.049082	35:14	32:17
C00527	glutcoa[m]	Glutaryl-CoA	0.0067452	0.0146799	2:0	2:0
C00010	coa[m]	Coenzyme A	0.00732833	0.0140563	8:4	10:3
	focytC[m];ficytC[m]	Ferrocytochrome C;Ferricytochrome c	0.00778954	0.00662907	3:0	3:0
C00349;C00222	2mop[m];msa[m]	2-Methyl-3-oxopropanoate;Malonate semialdehyde	0.00923088	0.0285686	1:1	1:1
C00091	succoa[m]	Succinyl-CoA	0.0113197	0.00895746	5:0	5:0
C00122	fum[m]	Fumarate	0.0188909	0.0249648	2:0	2:0
C00099	ala-B[m]	beta-Alanine	0.0309393	0.0266873	1:1	1:1
C00300	creat[m];pcreat[m]	Creatine;Phosphocreatine	0.031663	0.0477484	1:0	1:0
C05947	e4hglu[m]	L-erythro-4-Hydroxyglutamate	0.0366897	0.0358335	2:0	2:0
C00399	q10[m];q10h2[m]	Ubiquinone-10;Ubiquinol-10	0.0397225	0.021331	3:1	3:1
C00011	co2[m]	CO2	0.0413032	0.00410741	11:1	9:3
C00009	pi[m]	Phosphate	0.0415783	0.0232448	7:2	6:3
C03284;C00334	3aib[m];4abut[m]	L-3-Amino-isobutanoate;4-Aminobutanoate	0.0437426	0.0403915	0:1	0:1
	pail34p_hs[c]	phosphatidylinositol-3,4-bisphosphate (Homo sapiens)	0.00592729	0.00897259	2:1	2:1
C00092	g6p[c]	D-Glucose 6-phosphate	0.00928296	0.0135393	3:1	3:1
C00268	dhbpt[c]	6,7-Dihydrobiopterin	0.0118506	0.000116427	2:0	2:0
C00149	mal-L[c]	L-Malate	0.0136182	0.0246945	4:1	3:2
C00116	glyc[c]	Glycerol	0.0195588	0.00104795	1:1	1:1
C01159	23dpg[c]	2,3-Disphospho-D-glycerate	0.0211717	0.00435815	1:0	1:0
C00631	2pg[c]	D-Glycerate 2-phosphate	0.0259891	0.00313459	2:0	1:1
	ggn[c]	primed glycogenin (glycogenin-8[1,4-Glc])	0.0334959	0.00793403	1:0	1:0
C05981	pail345p_hs[c]	phosphatidylinositol-3,4,5-trisphosphate (Homo sapiens)	0.0376631	0.0421184	3:1	3:1
C00003;C00004	nad[m];nadh[m]	Nicotinamide adenine dinucleotide;Nicotinamide adenine dinucleotide - reduced	0.00345286	0.094839	17:3	17:4
	pail35p_hs[c];pail3p_hs[c]	phosphatidylinositol-3,5-bisphosphate (Homo sapiens);1-Phosphatidyl-1D-myo-inositol 3-phosphate (Homo sapiens)	0.00790745	0.253487	3:0	3:0
C00085	f6p[c]	D-Fructose 6-phosphate	0.0127291	0.118983	6:4	7:3
C03221	dd2coa[m];dd3coa[m]	trans-Dodec-2-enoyl-CoA;3-dodecenoyl CoA	0.0134215	0.0767339	1:0	1:0
	pail5p_hs[c]	1-Phosphatidyl-1D-myo-inositol 5-phosphate (Homo sapiens)	0.015548	0.20118	4:0	4:0
	paf_hs[c];ak2lgchol_hs[c]	1-alkyl 2-acteylglycerol 3-phosphocholine (homo sapiens);1-alkyl 2-lysoglycerol 3-phosphocholine	0.0168217	0.0950749	1:0	1:0
C00186	lac-L[m]	L-Lactate	0.0171318	0.0650904	3:0	3:0
	pail_hs[c]	phosphatidylinositol (homo sapiens)	0.0174113	0.12755	5:1	5:1
C01220	mi14p[c]	1D-myo-Inositol 1,4-bisphosphate	0.0249424	0.0537038	2:1	2:1
C03069	3mb2coa[m]	3-Methylbut-2-enoyl-CoA	0.0256514	0.211816	1:0	1:0
C00164	acac[c]	Acetoacetate	0.0260806	0.0830164	2:0	2:0
C00023;C00032	fe2[m];pheme[m]	Fe2;Protoheme	0.0297	0.127498	1:0	1:0
C00025	glu-L[m]	L-Glutamate	0.0328697	0.0883768	6:3	5:4
C00665	f26bp[c]	D-Fructose 2,6-bisphosphate	0.0370794	0.135866	2:0	1:0
C00016;C01352	fad[m];fadh2[m]	Flavin adenine dinucleotide oxidized;Flavin adenine dinucleotide reduced	0.0377113	0.0838298	4:2	6:2
C00022	pyr[c]	Pyruvate	0.0418645	0.201902	6:1	6:1
C00120	btn[e]	Biotin	0.0444899	0.178283	1:1	1:1
C00002	atp[c]	ATP	0.0463456	0.236876	36:22	32:26
C00008	adp[c]	ADP	0.0473494	0.173954	31:16	27:20
C00186	lac-L[c]	L-Lactate	0.0484701	0.0671078	2:1	2:1
	m2emgacpail_hs[r];m3gacpail_hs[r]	(dimannosyl),(phosphoethanolaminyl)-mannosyl-glucosylaminyl-acylphosphatidylinositol (H6);trimannosyl-glucosaminyl-acylphosphatidylinositol (H4)	0.049416	0.244657	1:1	1:1
C00093	glyc3p[c]	Glycerol 3-phosphate	0.0512534	0.00511266	1:2	1:2
C00937	lald-D[c]	D-Lactaldehyde	0.0525757	0.048849	2:1	2:2
C00490;C00531;C01732;C06028	itacon[m];itaccoa[m];mescon[m];mescoa[m]	Itaconate;Itaconyl-CoA;Mesaconate;Mesaconyl-CoA	0.0577503	0.0310062	1:0	1:0
C00015	udp[c]	UDP	0.0743726	0.0155928	4:1	3:2
	andrstrnglc[r]	androsterone glucuronide	0.0755441	0.0208686	0:1	0:1
C01245	mi145p[c]	1D-myo-Inositol 1,4,5-trisphosphate	0.076919	0.0159367	1:2	1:2
C00074	pep[c]	Phosphoenolpyruvate	0.0788661	0.0477738	2:2	1:3
	cs_a_deg2[l];cs_c_deg2[l];cs_e_deg3[l];ha_deg1[l];ha_pre1[l]	chondroitin sulfate A (GalNAc4S-GlcA), degradation product 2;chondroitin sulfate C (GalNAc6S-GlcA), degradation product 2;chondroitin sulfate E (GalNAc4,6diS-GlcA), degradation product 3;hyaluronan degradation product 1;hyaluronan biosynthesis, precursor 1	0.0807614	0.012364	2:0	2:0
C03740	gluala[e]	5-L-Glutamyl-L-alanine	0.0807748	0.0191882	0:1	0:1
	cs_c_deg3[l];cs_d_deg4[l]	chondroitin sulfate C (GalNAc6S-GlcA), degradation product 3;chondroitin sulfate D (GlcNAc6S-GlcA2S), degradation product 4	0.0850654	0.0151985	2:1	3:0
C00022	pyr[m]	Pyruvate	0.0887697	0.0431191	5:0	5:0
C00149	mal-L[m]	L-Malate	0.0975281	0.0287689	3:1	3:1
	Tyr-ggn[c]	Tyr-194 of apo-glycogenin protein (primer for glycogen synthesis)	0.102581	0.0359284	2:0	1:1
C00116;C00093	glyc[m];glyc3p[m]	Glycerol;Glycerol 3-phosphate	0.12492	0.037284	0:1	0:1
C01132	n2m2nmn[l];acgal[l];cs_a_deg5[l];cs_c_deg5[l];cs_d_deg2[l];cs_d_deg6[l];cs_e_deg7[l]	reducing GlcNAc removed form of n2m2nmasn (w/o peptide);N-Acetyl-D-galactosamine;chondroitin sulfate A (GalNAc4S-GlcA), degradation product 5;chondroitin sulfate C (GalNAc6S-GlcA), degradation product 5;chondroitin sulfate D (GlcNAc6S-GlcA2S), degradation product 2;chondroitin sulfate D (GlcNAc6S-GlcA2S), degradation product 6;chondroitin sulfate E (GalNAc4,6diS-GlcA), degradation product 7	0.127754	0.0140559	1:0	1:0
	n2m2mn[l];ksi_deg[l];ksii_core2_deg[l];f1a[l];cs_c_deg[l];cs_d_deg[l];cs_e_deg[l];cs_c[l];cs_d[l]	de-Fuc, reducing GlcNAc removed, de-Sia, de-Gal form of PA6 (w/o peptide linkage);keratan sulfate I, degradation product [8,11,14,17,20,23,26,29,32,35,38,39,40,41];keratan sulfate II (core 2-linked), degradation product [5,8,9];F1alpha;chondroitin sulfate C (GalNAc6S-GlcA), degradation product [1,4];chondroitin sulfate D (GlcNAc6S-GlcA2S), degradation product [1,5];chondroitin sulfate E (GalNAc4,…	0.139128	0.025091	1:1	2:0
C01272	mi1345p[c]	1D-myo-Inositol 1,3,4,5-tetrakisphosphate	0.175668	0.0137343	1:1	1:1
	mag_hs[c]	monoacylglycerol 2 (homo sapiens)	0.182381	0.0298246	1:1	1:1
C00140	acgam[l]	N-Acetyl-D-glucosamine	0.204722	0.0319882	2:1	2:1
C00683	mmcoa-S[m]	(S)-Methylmalonyl-CoA	0.216287	0.047776	1:0	1:0
C00003;C00004	nad[c];nadh[c]	Nicotinamide adenine dinucleotide;Nicotinamide adenine dinucleotide - reduced	0.23846	0.0373276	10:7	10:10
C00341;C00013;C00448	grdp[x];ppi[x];frdp[x]	Geranyl diphosphate;Diphosphate;Farnesyl diphosphate	0.271793	0.0266039	1:0	1:0
C05643	6hoxmelatn[c]	6-Hydroxymelatonin	0.323299	0.0234908	0:1	0:1
	etfox[m];etfrd[m]	Electron transfer flavoprotein oxidized;Electron transfer flavoprotein reduced	0.503597	0.00740987	2:0	2:0
C00080	h[c]	H+	0.511084	0.0393953	98:83	92:91
