# Supplementary material for: Metabolic Network Topology Reveals Transcriptional Regulatory Signatures of Type 2 Diabetes
Source: PLoS Comput Biol. 2010 Apr 1;6(4):e1000729. doi: 10.1371/journal.pcbi.1000729 (PMC2848542; doi:10.1371/journal.pcbi.1000729)
Supplement: Table S5 — Overlapping reporter metabolites between two case studies (Recon1). (0.05 MB XLS) [file pcbi.1000729.s006.xls]

## Sheet: Venn_T2DM vs FH-_T2DM vs NGT_T2
ID	Metabolite Name	T2DM vs FH-+T2DM vs NGT	T2DM vs FH-+T2DM vs IGT	T2DM vs NGT+T2DM vs IGT	T2DM vs FH-+T2DM vs NGT+T2DM vs IGT
akg[m]	2-Oxoglutarate	0	0	0	0
2oxoadp[m]	2-Oxoadipate	0	0	0	0
nad[m]	Nicotinamide adenine dinucleotide	0	0	0	0
nadh[m]	Nicotinamide adenine dinucleotide - reduced	0	0	0	0
pail34p_hs[c]	phosphatidylinositol-3,4-bisphosphate (Homo sapiens)	0	1	0	0
h[m]	H+	0	0	0	0
glutcoa[m]	Glutaryl-CoA	0	0	0	0
coa[m]	Coenzyme A	0	0	0	0
focytC[m]	Ferrocytochrome C	1	1	1	1
ficytC[m]	Ferricytochrome c	1	1	1	1
pail35p_hs[c]	phosphatidylinositol-3,5-bisphosphate (Homo sapiens)	0	0	0	0
pail3p_hs[c]	1-Phosphatidyl-1D-myo-inositol 3-phosphate (Homo sapiens)	0	0	0	0
2mop[m]	2-Methyl-3-oxopropanoate	0	0	0	0
msa[m]	Malonate semialdehyde	0	0	0	0
g6p[c]	D-Glucose 6-phosphate	0	0	0	0
succoa[m]	Succinyl-CoA	1	0	0	0
dhbpt[c]	6,7-Dihydrobiopterin	0	1	0	0
f6p[c]	D-Fructose 6-phosphate	0	1	0	0
dd2coa[m]	trans-Dodec-2-enoyl-CoA	0	0	0	0
dd3coa[m]	3-dodecenoyl CoA	0	0	0	0
mal-L[c]	L-Malate	0	0	0	0
pail5p_hs[c]	1-Phosphatidyl-1D-myo-inositol 5-phosphate (Homo sapiens)	0	0	0	0
paf_hs[c]	1-alkyl 2-acteylglycerol 3-phosphocholine (homo sapiens)	0	0	0	0
ak2lgchol_hs[c]	1-alkyl 2-lysoglycerol 3-phosphocholine	0	0	0	0
lac-L[m]	L-Lactate	0	0	0	0
pail_hs[c]	phosphatidylinositol (homo sapiens)	0	1	0	0
fum[m]	Fumarate	0	0	0	0
glyc[c]	Glycerol	0	0	0	0
23dpg[c]	2,3-Disphospho-D-glycerate	0	0	0	0
mi14p[c]	1D-myo-Inositol 1,4-bisphosphate	0	1	0	0
3mb2coa[m]	3-Methylbut-2-enoyl-CoA	0	0	0	0
2pg[c]	D-Glycerate 2-phosphate	0	0	0	0
acac[c]	Acetoacetate	1	0	0	0
fe2[m]	Fe2+	0	0	0	0
pheme[m]	Protoheme	0	0	0	0
ala-B[m]	beta-Alanine	0	0	0	0
creat[m]	Creatine	0	0	0	0
pcreat[m]	Phosphocreatine	0	0	0	0
glu-L[m]	L-Glutamate	0	0	0	0
ggn[c]	primed glycogenin (glycogenin-8[1,4-Glc])	0	0	0	0
e4hglu[m]	L-erythro-4-Hydroxyglutamate	0	0	0	0
f26bp[c]	D-Fructose 2,6-bisphosphate	0	0	0	0
pail345p_hs[c]	phosphatidylinositol-3,4,5-trisphosphate (Homo sapiens)	0	1	0	0
fad[m]	Flavin adenine dinucleotide oxidized	0	0	0	0
fadh2[m]	Flavin adenine dinucleotide reduced	0	0	0	0
q10[m]	Ubiquinone-10	1	0	0	0
q10h2[m]	Ubiquinol-10	1	0	0	0
co2[m]	CO2	0	0	0	0
pi[m]	Phosphate	0	0	0	0
pyr[c]	Pyruvate	0	0	0	0
3aib[m]	L-3-Amino-isobutanoate	0	0	0	0
4abut[m]	4-Aminobutanoate	0	0	0	0
btn[e]	Biotin	0	0	0	0
atp[c]	ATP	1	0	0	0
adp[c]	ADP	1	0	0	0
lac-L[c]	L-Lactate	0	0	0	0
m2emgacpail_hs[r]	(dimannosyl),(phosphoethanolaminyl)-mannosyl-glucosylaminyl-acylphosphatidylinositol (H6)	0	0	0	0
m3gacpail_hs[r]	trimannosyl-glucosaminyl-acylphosphatidylinositol (H4)	0	0	0	0
2dp6mep[m]	2-Decaprenyl-6-methoxyphenol	0	0	0	0
2dp6mobq[m]	2-Decaprenyl-6-methoxy-1,4-benzoquinone	0	0	0	0
35cgmp[c]	3',5'-Cyclic GMP	0	0	1	0
Tyr-ggn[c]	Tyr-194 of apo-glycogenin protein (primer for glycogen synthesis)	0	0	0	0
meoh[c]	Methanol	0	0	0	0
antipyrene[c]	antipyrene	0	0	1	0
dmantipyrine[c]	demethylated antipyrine	0	0	1	0
ksii_core4_pre1[g]	keratan sulfate II biosynthesis, precursor 1	0	0	1	0
ksii_core2_pre1[g]	keratan sulfate II biosynthesis, precursor 1	0	0	1	0
pail4p_hs[c]	1-Phosphatidyl-1D-myo-inositol 4-phosphate (Homo sapiens)	0	0	1	0
ddsmsterol[r]	7-Dehydrodesmosterol	0	0	0	0
7dhchsterol[r]	7-Dehydrocholesterol	0	0	0	0
dutp[c]	dUTP	0	0	0	0
dttp[c]	dTTP	0	0	0	0
didp[c]	dIDP	0	0	0	0
didp[n]	dIDP	0	0	0	0
ditp[n]	dITP	0	0	0	0
dtdp[n]	dTDP	0	0	0	0
dttp[n]	dTTP	0	0	0	0
dudp[n]	dUDP	0	0	0	0
idp[c]	IDP	0	0	0	0
idp[n]	IDP	0	0	0	0
itp[n]	ITP	0	0	0	0
ksi_pre14[g]	keratan sulfate I biosynthesis, precursor 14	0	0	1	0
ksi_pre17[g]	keratan sulfate I biosynthesis, precursor 17	0	0	1	0
ksi_pre20[g]	keratan sulfate I biosynthesis, precursor 20	0	0	1	0
ksi_pre23[g]	keratan sulfate I biosynthesis, precursor 23	0	0	1	0
ksi_pre26[g]	keratan sulfate I biosynthesis, precursor 26	0	0	1	0
ksi_pre29[g]	keratan sulfate I biosynthesis, precursor 29	0	0	1	0
ksi_pre32[g]	keratan sulfate I biosynthesis, precursor 32	0	0	1	0
ksi_pre35[g]	keratan sulfate I biosynthesis, precursor 35	0	0	1	0
ksii_core4_pre6[g]	keratan sulfate II biosynthesis, precursor 6	0	0	1	0
ksii_core4_pre9[g]	keratan sulfate II biosynthesis, precursor 9	0	0	1	0
ksii_core2_pre6[g]	keratan sulfate II biosynthesis, precursor 6	0	0	1	0
ksii_core2_pre9[g]	keratan sulfate II biosynthesis, precursor 9	0	0	1	0
ksi_pre5[g]	keratan sulfate I biosynthesis, precursor 5	0	0	1	0
ksi_pre8[g]	keratan sulfate I biosynthesis, precursor 8	0	0	1	0
ksi_pre11[g]	keratan sulfate I biosynthesis, precursor 11	0	0	1	0
5forthf[c]	5-Formiminotetrahydrofolate	0	0	0	0
forglu[c]	N-Formimidoyl-L-glutamate	0	0	0	0
ala-D[c]	D-Alanine	0	0	0	0
strch1[e]	starch, structure 1 (1,6-{7[1,4-Glc], 4[1,4-Glc]})	0	0	0	0
glygn2[e]	glycogen, structure 2 (glycogenin-1,6-{7[1,4-Glc], 4[1,4-Glc]})	0	0	0	0
n3m2masn[g]	((N-acetyl-D-glucosaminyl)3-(alpha-D-mannosyl)2-beta-D-mannosyl-diacetylchitobiosyl)-L-asparagine (protein)	0	0	0	0
estradiol[c]	Estradiol	0	0	1	0
m2mn[c]	(alpha-D-mannosyl)2-beta-D-mannosyl-N-acetylglucosamine	0	0	0	0
mn[c]	beta-1,4-mannose-N-acetylglucosamine	0	0	0	0
cdpchol[c]	CDPcholine	0	0	0	0
nmn[c]	NMN	0	0	0	0
glucys[c]	gamma-L-Glutamyl-L-cysteine	0	0	0	0
dhdascb[e]	Dehydroascorbate	0	0	0	0
hmbil[c]	Hydroxymethylbilane	0	0	0	0
camp[c]	cAMP	0	0	0	0
ksi_pre18[g]	keratan sulfate I biosynthesis, precursor 18	0	0	1	0
ksi_pre21[g]	keratan sulfate I biosynthesis, precursor 21	0	0	1	0
ksi_pre24[g]	keratan sulfate I biosynthesis, precursor 24	0	0	1	0
ksi_pre27[g]	keratan sulfate I biosynthesis, precursor 27	0	0	1	0
ksi_pre30[g]	keratan sulfate I biosynthesis, precursor 30	0	0	1	0
ksi_pre33[g]	keratan sulfate I biosynthesis, precursor 33	0	0	1	0
ksii_core4_pre3[g]	keratan sulfate II biosynthesis, precursor 3	0	0	1	0
ksii_core4_pre4[g]	keratan sulfate II biosynthesis, precursor 4	0	0	1	0
ksii_core4_pre7[g]	keratan sulfate II biosynthesis, precursor 7	0	0	1	0
ksii_core2_pre2[g]	keratan sulfate II biosynthesis, precursor 2	0	0	1	0
ksii_core2_pre3[g]	keratan sulfate II biosynthesis, precursor 3	0	0	1	0
ksii_core2_pre4[g]	keratan sulfate II biosynthesis, precursor 4	0	0	1	0
ksii_core2_pre7[g]	keratan sulfate II biosynthesis, precursor 7	0	0	1	0
ksi_pre2[g]	keratan sulfate I biosynthesis, precursor 2	0	0	1	0
ksi_pre3[g]	keratan sulfate I biosynthesis, precursor 3	0	0	1	0
ksi_pre6[g]	keratan sulfate I biosynthesis, precursor 6	0	0	1	0
ksi_pre9[g]	keratan sulfate I biosynthesis, precursor 9	0	0	1	0
ksi_pre12[g]	keratan sulfate I biosynthesis, precursor 12	0	0	1	0
ksi_pre15[g]	keratan sulfate I biosynthesis, precursor 15	0	0	1	0
core2[g]	Core 2	0	0	0	0
pcreat[c]	Phosphocreatine	0	0	0	0
utp[n]	UTP	0	0	0	0
udp[n]	UDP	0	0	0	0
ps_hs[m]	phosphatidylserine (homo sapiens)	0	0	0	0
l2fn2m2masn[g]	{[galactosyl-(1,4)-N-Acetyl-glucosaminyl-(1,2)-mannosyl-(1,3)-],[N-acetyl-glucosaminyl-(1,2)-mannosyl-(1,6)-]mannosyl-(1,4)-N-acetyl-glucosaminyl-(1,4)-[fucosyl-(1,6)]-N-acetyl-glucosaminyl}asparagine	0	0	0	0
dgtp[c]	dGTP	0	0	0	0
dgtp[n]	dGTP	0	0	0	0
cdp[n]	CDP	0	0	0	0
dgdp[n]	dGDP	0	0	0	0
dcdp[n]	dCDP	0	0	0	0
dctp[c]	dCTP	0	0	0	0
dctp[n]	dCTP	0	0	0	0
datp[n]	dATP	0	0	0	0
dadp[n]	dADP	0	0	0	0
gdp[n]	GDP	0	0	0	0
cholp[c]	Choline phosphate	0	0	0	0
Ser/Thr[g]	protein-linked serine or threonine residue (O-glycosylation site)	0	0	0	0
gam[e]	D-Glucosamine	0	0	0	0
ppa[c]	Propionate (n-C3:0)	0	0	0	0
h2co3[c]	carbonic acid	0	0	0	0
prostge2[e]	Prostaglandin E2	0	0	0	0
andrstrn[r]	Androsterone	0	0	0	0
lcts[g]	Lactose	0	0	0	0
3mgcoa[m]	3-Methylglutaconyl-CoA	0	0	1	0
selnp[c]	Selenophosphate	0	0	0	0
retinal[c]	Retinal	0	0	0	0
dadp[c]	dADP	0	0	0	0
cdp[c]	CDP	0	0	0	0
dcdp[c]	dCDP	0	0	0	0
cs_a,b_pre3[g]	chondroitin sulfate A (GalNAc4S-GlcA) and B (IdoA2S-GalNAc4S), precursor 3	0	0	0	0
ksii_core4_pre2[g]	keratan sulfate II boisynthesis, precursor 2	0	0	0	0
amp[c]	AMP	0	0	0	0
atp[n]	ATP	0	0	0	0
adp[n]	ADP	0	0	0	0
cs_a,b_pre2[g]	chondroitin sulfate A (GalNAc4S-GlcA) and B (IdoA2S-GalNAc4S), precursor 2	0	0	0	0
cs_c_pre2[g]	chondroitin sulfate C (GalNAc6S-GlcA), precursor 2	0	0	0	0
cs_d_pre3[g]	chondroitin sulfate D (GlcNAc6S-GlcA2S), precursor 3	0	0	0	0
cs_e_pre3[g]	chondroitin sulfate E (GalNAc4,6diS-GlcA), precursor 3	0	0	0	0
m6mpdol_L[r]	(alpha-D-Mannosyl)6-beta-D-mannosyl-diacetylchitobiosyldiphosphodolichol, human liver homolog	0	0	0	0
m7mpdol_L[r]	(alpha-D-Mannosyl)7-beta-D-mannosyl-diacetylchitobiosyldiphosphodolichol, human liver homolog	0	0	0	0
m6mpdol_U[r]	(alpha-D-Mannosyl)6-beta-D-mannosyl-diacetylchitobiosyldiphosphodolichol, human uterine homolog	0	0	0	0
m7mpdol_U[r]	(alpha-D-Mannosyl)7-beta-D-mannosyl-diacetylchitobiosyldiphosphodolichol, human uterine homolog	0	0	0	0
Ser-Gly/Ala-X-Gly[r]	protein-linked serine residue (glycosaminoglycan attachment site)	0	0	0	0
udpxyl[r]	UDP-D-xylose	0	0	0	0
xser[r]	Xyl-L-Ser (protein)	0	0	0	0
cit[c]	Citrate	0	0	0	0
dpcoa[c]	Dephospho-CoA	0	0	0	0
cit[e]	Citrate	0	0	0	0
pgp_hs[c]	phosphatidyl glycerol phosphate (homo sapiens)	0	0	0	0
ala-L[c]	L-Alanine	0	0	0	0
ksi_pre19[g]	keratan sulfate I biosynthesis, precursor 19	0	0	0	0
ksi_pre22[g]	keratan sulfate I biosynthesis, precursor 22	0	0	0	0
ksi_pre25[g]	keratan sulfate I biosynthesis, precursor 25	0	0	0	0
ksi_pre28[g]	keratan sulfate I biosynthesis, precursor 28	0	0	0	0
ksi_pre31[g]	keratan sulfate I biosynthesis, precursor 31	0	0	0	0
ksi_pre34[g]	keratan sulfate I biosynthesis, precursor 34	0	0	0	0
ksii_core4_pre5[g]	keratan sulfate II biosynthesis, precursor 5	0	0	0	0
ksii_core4_pre8[g]	keratan sulfate II biosynthesis, precursor 8	0	0	0	0
ksii_core2_pre5[g]	keratan sulfate II biosynthesis, precursor 5	0	0	0	0
ksii_core2_pre8[g]	keratan sulfate II biosynthesis, precursor 8	0	0	0	0
ksi_pre4[g]	keratan sulfate I biosynthesis, precursor 4	0	0	0	0
ksi_pre7[g]	keratan sulfate I biosynthesis, precursor 7	0	0	0	0
ksi_pre10[g]	keratan sulfate I biosynthesis, precursor 10	0	0	0	0
ksi_pre13[g]	keratan sulfate I biosynthesis, precursor 13	0	0	0	0
ksi_pre16[g]	keratan sulfate I biosynthesis, precursor 16	0	0	0	0
nh4[c]	Ammonium	0	0	0	0
hco3[e]	Bicarbonate	0	0	0	0
hco3[c]	Bicarbonate	0	0	0	0
mthgxl[c]	Methylglyoxal	0	0	0	0
gam6p[c]	D-Glucosamine 6-phosphate	0	0	0	0
acgpail_hs[c]	N-Acetyl-D-glucosaminylphosphatidylinositol	0	0	0	0
g1p[c]	D-Glucose 1-phosphate	0	0	0	0
25aics[c]	(S)-2-[5-Amino-1-(5-phospho-D-ribosyl)imidazole-4-carboxamido]succinate	0	0	0	0
12ppd-R[c]	(R)-Propane-1,2-diol	0	0	0	0
lald-D[c]	D-Lactaldehyde	0	0	0	0
acald[c]	Acetaldehyde	0	0	0	0
succ[c]	Succinate	0	0	0	0
44mzym[r]	4,4-dimethylzymosterol	0	0	0	0
fad[c]	Flavin adenine dinucleotide oxidized	0	0	0	0
dnad[c]	Deamino-NAD+	0	0	0	0
nicrnt[c]	Nicotinate D-ribonucleotide	0	0	0	0
estrone[c]	Estrone	0	0	0	0
ksi_pre36[g]	keratan sulfate I biosynthesis, precursor 36	0	0	0	0
ksii_core4_pre10[g]	keratan sulfate II biosynthesis, precursor 10	0	0	0	0
ksii_core2_pre10[g]	keratan sulfate II biosynthesis, precursor 10	0	0	0	0
6pgl[r]	6-phospho-D-glucono-1,5-lactone	0	0	0	0
hista[e]	Histamine	0	0	0	0
malt[l]	Maltose	0	0	0	0
mi1345p[c]	1D-myo-Inositol 1,3,4,5-tetrakisphosphate	0	0	0	0
mi134p[c]	1D-myo-Inositol 1,3,4-trisphosphate	0	0	0	0
mi145p[c]	1D-myo-Inositol 1,4,5-trisphosphate	0	0	0	0
malttr[l]	Maltotriose	0	0	0	0
pristcoa[x]	pristanoyl coa	0	0	0	0
prostgh2[c]	Prostaglandin H2	0	0	0	0
6pgc[r]	6-Phospho-D-gluconate	0	0	0	0
pail45p_hs[c]	phosphatidylinositol 4,5-bisphosphate (Homo sapiens)	0	0	0	0
selmeth[c]	Selenomethionine	0	0	0	0
seasmet[c]	Se-Adenosylselenomethionine	0	0	0	0
thm[c]	Thiamin	0	0	0	0
