# Supplementary material for: Metabolic Network Topology Reveals Transcriptional Regulatory Signatures of Type 2 Diabetes
Source: PLoS Comput Biol. 2010 Apr 1;6(4):e1000729. doi: 10.1371/journal.pcbi.1000729 (PMC2848542; doi:10.1371/journal.pcbi.1000729)
Supplement: Table S6 — Overlapping reporter metabolites between two case studies (EHMN). (0.06 MB XLS) [file pcbi.1000729.s007.xls]

## Sheet: Venn_T2DM vs FH-_T2DM vs NGT_T2
ID	Metabolite Name	T2DM vs FH-+T2DM vs NGT	T2DM vs FH-+T2DM vs IGT	T2DM vs NGT+T2DM vs IGT	T2DM vs FH-+T2DM vs NGT+T2DM vs IGT
C00003	NAD+	0	0	0	0
C00004	NADH	0	0	0	0
CE5312	6(R)-hydroxy-tetradeca-2E,8Z-dienoate	0	0	0	0
CE5315	8(R)-hydroxy-hexadeca-2E,6E,10Z-trienoate	0	0	0	0
CE5324	6(S)-hydroxy-tetradeca-2E,8Z-dienoate	0	0	0	0
CE5327	8(S)-hydroxy-hexadeca-2E,6E,10Z-trienoate	0	0	0	0
C00468	Estrone	0	0	0	0
C03024	Reduced flavoprotein	1	1	1	1
C14497	6beta-Hydroxytestosterone	1	1	1	1
C03161	Oxidized flavoprotein	1	1	1	1
CE1356	2beta-hydroxytestosterone	1	1	1	1
CE1358	11beta-hydroxytestosterone	1	1	1	1
C00951	Estradiol-17beta	0	1	0	0
C14749	19(S)-HETE	1	1	1	1
C14778	16(R)-HETE	1	1	1	1
C14779	9(S)-HETE	1	1	1	1
CE1450	11-hydroxyeicosatetraenoate	1	1	1	1
CE5705	8-hydroxyeicosatetraenoate	1	1	1	1
CE7228	13-HETE	1	1	1	1
CE7231	7-HETE	1	1	1	1
CE7234	10-HETE	1	1	1	1
CE7243	18-HETE	1	1	1	1
CE7244	17-HETE	1	1	1	1
C14781	15H-11,12-EETA	1	1	1	1
C14813	11H-14,15-EETA	1	1	1	1
C14782	11,12,15-THETA	1	1	1	1
C14814	11,14,15-THETA	1	1	1	1
C00044	GTP	0	0	0	0
CE2705	quinonoid dihydrobiopterin	0	1	0	0
C00068	Thiamin diphosphate	0	0	0	0
C00091	Succinyl-CoA	0	0	0	0
C03205	11-Deoxycorticosterone	0	0	0	0
C03748	16alpha-Hydroxyprogesterone	1	1	1	1
CE1353	6beta-hydroxyprogesterone	1	1	1	1
CE5888	2beta-hydroxyprogesterone	1	1	1	1
CE5049	one carbon unit	1	1	1	1
C02944	3-cis-Dodecenoyl-CoA	0	0	0	0
C05345	beta-D-Fructose 6-phosphate	0	0	0	0
C00031	D-Glucose	0	0	0	0
C01885	Acylglycerol	0	0	0	0
C00641	1,2-Diacyl-sn-glycerol	1	1	1	1
C02112	2-Acylglycerol	0	0	0	0
C04598	1-Alkyl-2-acetyl-sn-glycero-3-phosphocholine	0	0	0	0
C04317	1-Organyl-2-lyso-sn-glycero-3-phosphocholine	1	0	0	0
C02305	Phosphocreatine	1	0	0	0
C02939	3-Methylbutanoyl-CoA	0	0	0	0
C03069	3-Methylcrotonyl-CoA	0	0	0	0
C00248	Lipoamide	0	0	0	0
C01159	2,3-Bisphospho-D-glycerate	0	0	0	0
C00631	2-Phospho-D-glycerate	0	0	0	0
C00135	L-Histidine	0	0	0	0
C00390	Ubiquinol	0	0	0	0
C00399	Ubiquinone	0	0	0	0
C00302	Glutamate	0	0	0	0
C06604	Parathion	1	1	1	1
C06606	Paraoxon	1	1	1	1
C02308	Phosphorylase b	0	0	0	0
C02307	Phosphorylase a	0	0	0	0
C00017	Protein	1	1	1	1
C00562	Phosphoprotein	1	1	1	1
C04090	Ubiquitin C-terminal thiolester	1	1	1	1
C00496	Ubiquitin	1	1	1	1
C00145	Thiol	1	1	1	1
C00585	Protein tyrosine	1	1	1	1
C01167	Protein tyrosine phosphate	1	1	1	1
C01609	Protamine	1	1	1	1
C02729	O-Phosphoprotamine	1	1	1	1
C03815	trans-2,3-Didehydroacyl-CoA	0	0	0	0
C04512	trans,trans-2,3,4,5-Tetradehydroacyl-CoA	0	0	0	0
CE6227	CoA-18-COOH-15E-dinor-LTE4	0	0	0	0
CE6225	16E-18-oxo-18-CoA-dinor-LTE4	0	0	0	0
C00322	2-Oxoadipate	0	0	0	0
C00527	Glutaryl-CoA	0	0	0	0
C06157	S-Glutaryldihydrolipoamide	0	0	0	0
CE4795	2-trans-cis,cis,cis,cis-4,8,11,14-eicosapentaenoyl-CoA	0	0	0	0
CE5121	trans-3-decenoyl-CoA	0	0	0	0
CE5117	(3E,5Z,8Z)-tetradecatrienoyl-CoA	0	0	0	0
CE2442	3Z,7Z,10Z-hexadecatrienoyl-CoA	0	0	0	0
CE5115	trans-3-cis-5,8,11,14-eicosapentaenoyl-CoA	0	0	0	0
CE5116	trans-3-cis-8,11,14-eicosatetraenoyl-CoA	0	0	0	0
CE5114	trans-2-cis,cis,cis-8,11,14-eicosatetraenoyl-CoA	0	0	0	0
CE5118	trans-2-cis,cis-4,8-tetradecatrienoyl-CoA	0	0	0	0
CE5119	trans-3-cis-8-tetradecadienoyl-CoA	0	0	0	0
CE5120	trans-2-cis-8-tetradecadienoyl-CoA	0	0	0	0
C04549	1-Phosphatidyl-1D-myo-inositol 3-phosphate	1	0	0	0
CE5132	1-phosphatidyl-myo-inositol 3,5-bisphosphate	1	1	1	1
C01213	(R)-2-Methyl-3-oxopropanoyl-CoA	0	0	0	0
C00458	dCTP	1	0	0	0
C05381	3-Carboxy-1-hydroxypropyl-ThPP	0	0	0	0
C01169	S-Succinyldihydrolipoamide	0	0	0	0
C00417	cis-Aconitate	0	0	0	0
C05643	6-Hydroxymelatonin	0	1	0	0
CE5276	dopamine o-quinone	1	1	1	1
C02320	R-S-Glutathione	0	0	0	0
CE5723	5'-carboxy-gama-chromanol	0	1	0	0
CE5845	5'-carboxy-alpha-chromanol	0	1	0	0
CE5846	11'-carboxy-gama-tocotrienol	0	1	0	0
CE5847	9'-carboxy-gama-tocotrienol	0	1	0	0
CE5848	7'-carboxy-gama-tocotrienol	0	1	0	0
CE5849	7'-carboxy-alpha-tocotrienol	0	1	0	0
CE5850	11'-carboxy-alpha-tocotrienol	0	1	0	0
CE5851	9'-carboxy-alpha-tocotrienol	0	1	0	0
C00829	Naphthalene	1	1	1	1
C14786	(1R,2S)-Naphthalene 1,2-oxide	1	1	1	1
C14787	(1S,2R)-Naphthalene 1,2-oxide	1	1	1	1
C14784	1,2-Dihydroxy-3,4-epoxy-1,2,3,4-tetrahydronaphthalene	1	1	1	1
C06790	Trichloroethene	1	1	1	1
C11148	TCE epoxide	1	1	1	1
C14866	Chloral	1	1	1	1
C07490	Trichloroethanol	1	1	1	1
C11150	Trichloroacetate	1	1	1	1
C07535	Benzpyrene	1	1	1	1
C11036	Bromobenzene	1	1	1	1
C14839	Bromobenzene-3,4-oxide	1	1	1	1
C14840	Bromobenzene-2,3-oxide	1	1	1	1
C11088	1,2-Dibromoethane	1	1	1	1
C14870	2-Bromoacetaldehyde	1	1	1	1
C13645	Hydrobromic acid	1	1	1	1
C11713	beta-Naphthol	1	1	1	1
C14039	1,1-Dichloroethylene	1	1	1	1
C14857	1,1-Dichloroethylene epoxide	1	1	1	1
C14858	2,2-Dichloroacetaldehyde	1	1	1	1
C14859	Chloroacetyl chloride	1	1	1	1
C14040	1-Nitronaphthalene	1	1	1	1
C14800	1-Nitronaphthalene-5,6-oxide	1	1	1	1
C14802	1-Nitronaphthalene-7,8-oxide	1	1	1	1
C14453	4-Bromophenol	1	1	1	1
C14845	4-Bromophenol-2,3-epoxide	1	1	1	1
C14556	9-Hydroxybenzo[a]pyrene	1	1	1	1
C14854	9-Hydroxybenzo[a]pyrene-4,5-oxide	1	1	1	1
C14852	Benzo[a]pyrene-7,8-diol	1	1	1	1
C14853	Benzo[a]pyrene-7,8-dihydrodiol-9,10-oxide	1	1	1	1
CN0016	Dibenzo[a,l]pyrene	1	1	1	1
CN0019	Dibenzo[a,l]pyrene-11,12-diol-13,14-epoxide	1	1	1	1
CN0020	7,12-Dimethylbenz[a]anthracene	1	1	1	1
CN0023	7,12-Dimethylbenz[a]anthracene-3,4-diol-1,2-epoxide	1	1	1	1
C02336	beta-D-Fructose	0	0	0	0
C00015	UDP	0	0	0	0
C00002	ATP	0	0	0	0
C05300	16alpha-Hydroxyestrone	0	0	1	0
C05141	Estriol	0	0	1	0
C06254	Lysophospholipid	0	0	0	0
C05966	15(S)-HPETE	0	0	0	0
C14768	5,6-EET	0	0	1	0
C14769	8,9-EET	0	0	1	0
C14770	11,12-EET	0	0	1	0
C14771	14,15-EET	0	0	1	0
C00020	AMP	0	0	0	0
C00164	Acetoacetate	0	0	0	0
C00332	Acetoacetyl-CoA	0	0	0	0
C01089	(R)-3-Hydroxybutanoate	0	0	0	0
C00026	2-Oxoglutarate	0	0	0	0
C01595	Linoleate	0	0	0	0
C01835	Maltotriose	0	0	0	0
C01936	Maltohexaose	0	0	0	0
CE2835	maltopentaose	0	0	0	0
C02052	Maltotetraose	0	0	0	0
CE2837	maltoheptaose	0	0	0	0
CE2838	maltononaose	0	0	0	0
CE2839	maltodecaose	0	0	0	0
C00611	N-Acetyllactosamine	0	0	1	0
C00081	ITP	0	0	0	0
C00104	IDP	0	0	0	0
C00162	Fatty acid	0	0	0	0
C00346	Ethanolamine phosphate	0	0	1	0
C00350	Phosphatidylethanolamine	0	0	0	0
CE6364	1-O-1'-alkenyl-2-acyl-phosphatidylethanolamine	0	0	0	0
CE6498	1-O-alk-1'-enyl-2-lyso-phosphatidylethanolamine	0	0	0	0
CE7098	1-alkyl-2-acyl-sn-glycero-3-phosphocholine	0	0	0	0
C00203	UDP-N-acetyl-D-galactosamine	0	0	0	0
CE5614	IsoGlobotriasyl ceramide	0	0	1	0
CE5618	isoglobotetraosyl ceramide	0	0	1	0
CE5620	isoglobopentaosyl ceramide	0	0	1	0
G00097	(Gal)3 (GalNAc)1 (Glc)1 (Cer)1	0	0	1	0
G00102	(Gal)3 (GalNAc)1 (Glc)1 (GlcNAc)1 (Cer)1	0	0	1	0
C04845	N-Acetyl-D-glucosaminyl-1,3-beta-D-galactosyl-1,4-D-	0	0	1	0
C04938	N-Acetyl-D-glucosaminyl-1,3-beta-D-galactosyl-1,4-N-acetyl-beta-D-	0	0	1	0
G00051	(Gal)3 (Glc)1 (GlcNAc)1 (Cer)1	0	0	1	0
G00068	(Gal)3 (Glc)1 (GlcNAc)3 (Cer)1	0	0	1	0
G00076	(Gal)3 (Glc)1 (GlcNAc)2 (LFuc)1 (Cer)1	0	0	1	0
G00089	(Gal)3 (Glc)1 (GlcNAc)2 (LFuc)1 (Cer)1	0	0	0	0
G00082	(Gal)3 (Glc)1 (GlcNAc)2 (LFuc)3 (Cer)1	0	0	1	0
G00085	(Gal)4 (Glc)1 (GlcNAc)3 (LFuc)2 (Cer)1	0	0	1	0
G00086	(Gal)4 (Glc)1 (GlcNAc)3 (LFuc)3 (Cer)1	0	0	1	0
G00090	(Gal)3 (Glc)1 (GlcNAc)2 (LFuc)2 (Cer)1	0	0	1	0
C00836	Sphinganine	0	0	0	0
C03862	Dolichyl phosphate D-mannose	0	0	0	0
G00147	(GlcN)1 (Ino(acyl)-P)1 (Man)1 (EtN)1 (P)1	0	0	1	0
G00148	(GlcN)1 (Ino(acyl)-P)1 (Man)2 (EtN)1 (P)1	0	0	1	0
C00664	5-Formiminotetrahydrofolate	0	0	0	0
C00439	N-Formimino-L-glutamate	0	0	0	0
C00283	Hydrogen sulfide	0	0	1	0
C00123	L-Leucine	0	0	0	0
CE5789	kinetensin 1-8	0	0	0	0
CE5797	neuromedin N	0	0	0	0
CE5798	neuromedin N (1-4)	0	0	0	0
C00046	RNA	0	0	1	0
C03721	Protein tyrosine-O-sulfate	0	0	0	0
C01256	[Pyruvate dehydrogenase (lipoamide)]	0	0	0	0
C01293	[Pyruvate dehydrogenase (lipoamide)] phosphate	0	0	0	0
C01756	Thiopurine	0	0	0	0
C03542	Thiopurine S-methylether	0	0	0	0
C02188	Protein lysine	0	0	0	0
C03635	Protein N-ubiquityllysine	0	0	0	0
C02871	Peptide L-aspartate	0	0	0	0
C03957	Peptide 3-hydroxy-L-aspartate	0	0	0	0
C03245	ADP-D-ribosyl-acceptor	0	0	0	0
C03798	Peptidylproline (omega=180)	0	0	1	0
C03633	Peptidylproline (omega=0)	0	0	1	0
C03845	5alpha-Cholest-8-en-3beta-ol	0	0	0	0
3C00005	#N/A	0	0	0	0
C04530	4,4-Dimethyl-5alpha-cholest-7-en-3beta-ol	0	0	0	0
C04814	4beta-Hydroxymethyl-4alpha-methyl-5alpha-cholest-7-en-3beta-ol	0	0	0	0
C08825	Lophenol	0	0	0	0
C11509	3beta-Hydroxy-4beta-methyl-5alpha-cholest-7-ene-4alpha-carbaldehyde	0	0	0	0
CE2054	20-carboxy-leukotriene-B4	0	0	0	0
CE5178	5-oxo-6-trans-leukotriene B4	0	0	0	0
CE5349	5-oxo-6E-12-epi-LTB4	0	0	0	0
CE5179	6,7-dihydro-5-oxo-leukotriene B4	0	0	0	0
CE5352	6,7-dihydro-leukotriene B4	0	0	0	0
CE5343	6,7-dihydro-5-oxo-12-epi-LTB4	0	0	0	0
CE5350	6,7-dihydro-12-epi-LTB4	0	0	0	0
C14825	9(10)-EpOME	0	0	1	0
C14826	12(13)-EpOME	0	0	1	0
C01962	Thiocysteine	0	0	0	0
C05861	alpha-D-Mannosyl-beta-D-mannosyl-	0	0	1	0
G00005	(GlcNAc)2 (Man)3 (PP-Dol)1	0	0	1	0
C05868	(alpha-D-Mannosyl)8-beta-D-mannosyl-	0	0	0	0
G10598	(Glc)1 (GlcNAc)2 (Man)9 (PP-Dol)1	0	0	1	0
G00008	(Glc)3 (GlcNAc)2 (Man)9 (PP-Dol)1	0	0	1	0
G00020	(GlcNAc)5 (Man)3 (Asn)1	0	0	0	0
G00017	(Gal)2 (GlcNAc)4 (LFuc)1 (Man)3 (Asn)1	0	0	0	0
G10599	(Glc)2 (GlcNAc)2 (Man)9 (PP-Dol)1	0	0	1	0
C02189	Protein serine	0	0	0	0
CE4813	eicosa-5,8,11,14,17-all-cis-pentaenoyl-CoA	0	0	0	0
CE5647	alpha-mannose-glucosaminyl-acyl-phosphatidylinositol	0	0	1	0
CE5648	ethanolaminephosphate-2-mannosealpha1-4glucosaminyl-acyl-phosphatidylinositol	0	0	1	0
CE5964	EtNP-Man-Man-(EtNP)Man-GlcN-acyl-PI	0	0	1	0
CE5965	EtNP-Man-(EtNP)Man-(EtNP)Man-GlcN-acyl-PI	0	0	1	0
CE5650	mannosealpha1-2mannosealpha1-6(ethanolaminephosphate-2)mannosealpha1-4glucosaminyl-acyl-phosphatidylinositol	0	0	1	0
C01277	1-Phosphatidyl-1D-myo-inositol 4-phosphate	0	0	1	0
CE5101	1-phosphatidyl-myo-inositol 5-phosphate	0	0	1	0
C11554	1-Phosphatidyl-1D-myo-inositol 3,4-bisphosphate	0	0	0	0
CE5649	mannosealpha1-6(ethanolaminephosphate-2)mannosealpha1-4(acyl)glucosaminylphosphatidylinositol	0	0	1	0
C01024	Hydroxymethylbilane	0	0	0	0
C00575	3',5'-Cyclic AMP	0	0	0	0
C00942	3',5'-Cyclic GMP	0	0	1	0
C01344	dIDP	0	0	0	0
C00459	dTTP	0	0	0	0
C01346	dUDP	0	0	0	0
C01164	Cholesta-5,7-dien-3beta-ol	0	0	0	0
C05108	14-Demethyllanosterol	0	0	1	0
8C00001	#N/A	0	0	0	0
CE2321	cholesta-5,7,24-trien-3beta-ol	0	0	0	0
C03758	4-(2-Aminoethyl)-1,2-benzenediol	0	0	0	0
C00483	Tyramine	0	0	0	0
C05604	2-Carboxy-2,3-dihydro-5,6-dihydroxyindole	0	0	0	0
C00669	gamma-L-Glutamyl-L-cysteine	0	0	0	0
C02630	2-Hydroxyglutarate	0	0	0	0
C01134	Pantetheine 4'-phosphate	0	0	0	0
C00882	Dephospho-CoA	0	0	1	0
C01045	N-Formyl-L-glutamate	0	0	0	0
C01628	Vitamin K	0	0	0	0
C05849	Vitamin K epoxide	0	0	0	0
C06205	1,2-Dihydronaphthalene-1,2-diol	0	0	1	0
C03012	Naphthalene-1,2-diol	0	0	1	0
C14849	Benzo[a]pyrene-9,10-oxide	0	0	1	0
C14850	Benzo[a]pyrene-7,8-oxide	0	0	1	0
C14851	Benzo[a]pyrene-4,5-oxide	0	0	1	0
CN0012	Benzo[a]pyrene-2,3-oxide	0	0	1	0
CN0017	Dibenzo[a,l]pyrene-11,12-epoxide	0	0	1	0
CN0018	Dibenzo[a,l]pyrene-11,12-diol	0	0	1	0
CN0021	7,12-Dimethylbenz[a]anthracene-3,4-oxide	0	0	1	0
CN0022	7,12-Dimethylbenz[a]anthracene-3,4-diol	0	0	1	0
C00721	Dextrin	0	0	0	0
C04212	3',5'-Cyclic nucleotide	0	0	0	0
C01117	Nucleoside 5'-phosphate	0	0	0	0
C00080	H+	0	0	0	0
CE5316	8(R)-hydroxy-hexadeca-4E,6E,10Z-trienoate	0	0	0	0
CE5313	6(R)-hydroxy-tetradeca-4E,8Z-dienoate	0	0	0	0
CE5328	8(S)-hydroxy-hexadeca-4E,6E-10Z-trienoate	0	0	0	0
CE5325	6(S)-hydroxy-tetradeca-4E,8Z-dienoate	0	0	0	0
C00535	Testosterone	0	0	0	0
C04849	(5Z,9E,14Z)-(8xi,11R,12S)-11,12-Epoxy-8-hydroxyicosa-5,9,14-trienoic	0	0	0	0
C04742	15(S)-HETE	0	0	0	0
CE2725	9,10-epoxy-(6Z,12Z)-octadecadienoic acid	0	0	0	0
CE2730	12,13-epoxy-(6Z,9Z)-octadecadienoic acid	0	0	0	0
CE2726	7,8-epoxy-(4Z,10Z)-hexadecadienoic acid	0	0	0	0
CE2727	5,6-epoxy-(8Z)-tetradecenoic acid	0	0	0	0
CE2728	10,11-epoxy-(4Z,7Z)-hexadecadienoic acid	0	0	0	0
CE2729	8,9-epoxy-(5Z)-tetradecenoic acid	0	0	0	0
C00100	Propanoyl-CoA	0	0	0	0
C00040	Acyl-CoA	0	0	0	0
C00060	Carboxylate	0	0	0	0
C05460	3alpha,7alpha,12alpha-Trihydroxy-5beta-cholest-24-enoyl-CoA	0	0	0	0
CE5236	O2'-4a-cyclic-tetrahydrobiopterin	0	0	0	0
C00136	Butanoyl-CoA	0	0	0	0
C00042	Succinate	0	0	0	0
C00288	HCO3-	0	0	0	0
C00154	Palmitoyl-CoA	0	0	0	0
C05275	trans-Dec-2-enoyl-CoA	0	0	0	0
C05279	trans,cis-Lauro-2,6-dienoyl-CoA	0	0	0	0
C00096	GDPmannose	0	0	0	0
C00089	Sucrose	0	0	0	0
C05402	Melibiose	0	0	0	0
C00084	Acetaldehyde	0	0	0	0
G00057	(Gal)3 (GalNAc)1 (Glc)1 (GlcNAc)1 (LFuc)1 (Cer)1	0	0	0	0
G00073	(Gal)4 (GalNAc)1 (Glc)1 (GlcNAc)2 (LFuc)1 (Cer)1	0	0	0	0
G00078	(Gal)4 (Glc)1 (GlcNAc)3 (Cer)1	0	0	0	0
C02686	Galactosylceramide	0	0	0	0
C06126	Digalactosylceramide	0	0	0	0
C00708	Iodide	0	0	0	0
C05889	Undecaprenyl-diphospho-N-acetylmuramoyl-(N-acetylglucosamine)-L-	0	0	0	0
C05890	Undecaprenyl-diphospho-N-acetylmuramoyl-(N-acetylglucosamine)-L-	0	0	0	0
C05893	Undecaprenyl-diphospho-N-acetylmuramoyl-(N-acetylglucosamine)-L-	0	0	0	0
C05894	Undecaprenyl-diphospho-N-acetylmuramoyl-(N-acetylglucosamine)-L-	0	0	0	0
C05898	Undecaprenyl-diphospho-N-acetylmuramoyl-(N-acetylglucosamine)-L-	0	0	0	0
C05899	Undecaprenyl-diphospho-N-acetylmuramoyl-(N-acetylglucosamine)-L-	0	0	0	0
C00677	Deoxynucleoside triphosphate	0	0	0	0
C00039	DNA	0	0	0	0
C00658	trans-2,3-Dehydroacyl-CoA	0	0	0	0
C01944	Octanoyl-CoA	0	0	0	0
C02593	Tetradecanoyl-CoA	0	0	0	0
C06486	(6R)-6-(L-erythro-1,2-Dihydroxypropyl)-5,6,7,8-tetrahydro-4a-	0	0	0	0
C06487	(6R)-6-(L-erythro-1,2-Dihydroxypropyl)-7,8-dihydro-6H-pterin	0	0	0	0
CE6182	20-CoA-20-oxo-leukotriene B4	0	0	0	0
CE5969	10,11-dihydro-LTB4-CoA	0	0	0	0
CE4995	10,11-dihydro-12R-hydroxy-leukotriene E4	0	0	0	0
CE5348	5-oxo-12(R)-hydroxy-eicosa-8E,10E,14Z-trienoyl-CoA	0	0	0	0
CE5341	5-oxo-12(S)-hydroxy-eicosa-2E,8E,10E,14Z-tetraenoyl-CoA	0	0	0	0
CE5342	5-oxo-12(S)-hydroxy-eicosa-8E,10E,14Z-trienoyl-CoA	0	0	0	0
CE5347	5-oxo-12(R)-hydroxy-eicosa-2E,8E,10E,14Z-tetraenoyl-CoA	0	0	0	0
CE5970	5(S),12(R)-dihydroxy-eicosa-2,8-trans-6,14-cis-tetraenoyl-CoA	0	0	0	0
CE6190	CoA-20-COOH-LTE4	0	0	0	0
CE6186	18E-20-oxo-20-CoA-LTB4	0	0	0	0
CE6188	CoA-omega-COOH-dinor-LTE4	0	0	0	0
CE6191	18E-20-oxo-20-CoA-LTE4	0	0	0	0
CE6195	CoA-omega-COOH-tetranor-LTE3	0	0	0	0
CE6228	13E-tetranor-16-oxo-16-CoA-LTE4	0	0	0	0
C04717	13(S)-HPODE	0	0	0	0
CE2163	13-hydroxy-(9Z,11E)-octadecadienoate	0	0	0	0
CE2539	9-hydroxyoctadecadienoate	0	0	0	0
C01181	4-Trimethylammoniobutanoate	0	0	0	0
C05543	3-Dehydroxycarnitine	0	0	0	0
CE4828	trans-2-all-cis-6,9,12,15,18,21-tetracosaheptaenoyl-CoA	0	0	0	0
CE2437	2E,6Z,9Z,12Z-octadecatetraenoyl-CoA	0	0	0	0
CE2440	4Z,7Z,10Z-hexadecatrienoyl-CoA	0	0	0	0
CE4794	cis-6-dodecenoyl-CoA	0	0	0	0
CE4838	trans-2-all-cis-6,9,12,15,18-tetracosahexaenoyl-CoA	0	0	0	0
C00198	D-Glucono-1,5-lactone	0	0	0	0
C01236	D-Glucono-1,5-lactone 6-phosphate	0	0	0	0
C01194	1-Phosphatidyl-D-myo-inositol	0	0	0	0
C01288	N-Acetyl-D-glucosaminylphosphatidylinositol	0	0	0	0
C01220	1D-myo-Inositol 1,4-bisphosphate	0	0	0	0
C01225	sn-glycero-3-Phospho-1-inositol	0	0	0	0
C04063	D-myo-Inositol 3,4-bisphosphate	0	0	0	0
C04637	1-Phosphatidyl-D-myo-inositol 4,5-bisphosphate	0	0	0	0
C07296	4,8,12-Trimethyltridecanoyl-CoA	0	0	0	0
CE5938	(4R,8R,12R)-trimethyl-2E-tridecenoyl-CoA	0	0	0	0
CE2038	trans-2,3-dehydropristanoyl-CoA	0	0	0	0
CE5941	(2S,6R,10R)-trimethyl-2E-hendecenoyl-CoA	0	0	0	0
C00683	(S)-2-Methyl-3-oxopropanoyl-CoA	0	0	0	0
CE6243	S-(9-deoxy-delta9,12-PGD2)-glutathione	0	0	0	0
CE6241	S-(9-deoxy-delta12-PGD2)-glutathione	0	0	0	0
C04823	1-(5'-Phosphoribosyl)-5-amino-4-(N-succinocarboxamide)-imidazole	0	0	0	0
C05272	trans-Hexadec-2-enoyl-CoA	0	0	0	0
C01832	Lauroyl-CoA	0	0	0	0
C03221	2-trans-Dodecenoyl-CoA	0	0	0	0
C05276	trans-Oct-2-enoyl-CoA	0	0	0	0
C05273	trans-Tetradec-2-enoyl-CoA	0	0	0	0
C05271	trans-Hex-2-enoyl-CoA	0	0	0	0
C05270	Hexanoyl-CoA	0	0	0	0
C05274	Decanoyl-CoA	0	0	0	0
C05691	Se-Adenosylselenomethionine	0	0	0	0
C00822	Dopaquinone	0	0	0	0
C01829	O-(4-Hydroxy-3,5-diidophenyl)-3,5-diiodo-L-tyrosine	0	0	0	0
C02465	Triiodothyronine	0	0	0	0
C03231	3-Methylglutaconyl-CoA	0	0	0	0
CE5875	2-methylglutaconyl-CoA	0	0	0	0
CE5068	2-methylglutaconic acid	0	0	0	0
C00857	Deamino-NAD+	0	0	0	0
C01185	Nicotinate D-ribonucleotide	0	0	0	0
CE5718	11'-carboxy-gama-chromanol	0	0	0	0
CE5719	9'-carboxy-gama-chromanol	0	0	0	0
CE5721	7'-carboxy-gama-chromanol	0	0	0	0
CE5855	11'-carboxy-alpha-chromanol	0	0	0	0
CE5856	9'-carboxy-alpha-chromanol	0	0	0	0
CE5844	7'-carboxy-alpha-chromanol	0	0	0	0
G00143	(GlcNAc)1 (Ino-P)1	0	0	0	0
