# Supplementary material for: Metabolic Network Topology Reveals Transcriptional Regulatory Signatures of Type 2 Diabetes
Source: PLoS Comput Biol. 2010 Apr 1;6(4):e1000729. doi: 10.1371/journal.pcbi.1000729 (PMC2848542; doi:10.1371/journal.pcbi.1000729)
Supplement: Table S8 — Experimentally studies linking metabolite levels to T2DM pathophysiology (0.12 MB PDF) [file pcbi.1000729.s009.pdf]

**Table S8.** Experimentally studies linking metabolite levels to T2DM pathophysiology.

| Reference                       | Metabolites                                                                   | Organism              | Source              | Phenotypic observation                                                                                                                                                                                      |
|---------------------------------|-------------------------------------------------------------------------------|-----------------------|---------------------|-------------------------------------------------------------------------------------------------------------------------------------------------------------------------------------------------------------|
| Koves et al. [1]                | Citrate; L-Malate; Fumarate; L-Lactate; 2-Oxoglutarate                        | Rodent                | Muscle              | Lower amounts of organic acids were found in obese diabetic rats compared to the lean diabetic rats                                                                                                         |
| Salek et al. [2]                | L-Leucine; Pyruvate; Citrate; beta-Alanine; D-Alanine; L-Alanine              | Human                 | Urine               | Increased amounts in T2DM                                                                                                                                                                                   |
|                                 | L-Malate;, L-Glutamate; Fumarate; Phosphocreatine                             |                       |                     | Decreased amounts in T2DM                                                                                                                                                                                   |
| Ellis et al [3]<br>Ye et al [4] | Palmitoyl-CoA; Tetradecanoyl-CoA; Palmitoleoyl-CoA; Decanoyl-CoA; Lauroyl-CoA | Human/Rodent          | Muscle              | Strong negative correlation between insulin sensitivity and the content of LC-CoA (Ellis et al)<br>Fall of glucose uptake into muscle was accompanied by increase in plasma TG and muscle LC-CoA (Ye et al) |
| Chavez et al [5]                | 1,2 -Diacyl-sn-glycerol (DAG); Palmitoyl-CoA; Palmitoleoyl-CoA                | Rodent tissue culture | Adipocytes/myotubes | Palmitate induced the accrual of ceramide and diacylglycerol (DAG), two lipid metabolites inhibit insulin signaling in cultured cells                                                                       |
| Neschen et al [6]               | Glycerol -3-phosphate; glycerol                                               | Rodent                | Liver               | Suppression of mitochondrial GPAT1 (TG synthesis) activity results in lowered DAG and reversal of hepatic insulin resistance                                                                                |
| Yu et al. [7]                   | 1,2 -Diacyl-sn-glycerol (DAG); Palmitoyl-CoA; Palmitoleoyl-CoA                | Rodent                | Muscle              | Accumulation of DAG and other bioactive lipid molecules is thought to engage stress-activated serine kinases that interfere with insulin signal transduction                                                |
| Holland et all [8]              | Palmitoleoyl-CoA                                                              | Rodent                | Liver               | Inhibition of ceramide synthesis protected rodents against insulin resistance induced by infusion of saturated fatty acid                                                                                   |

## References

1. Koves TR, Ussher JR, Noland RC, Slentz D, Mosedale M, et al. (2008) Mitochondrial overload and incomplete fatty acid oxidation contribute to skeletal muscle insulin resistance. *Cell Metab* 7: 45-56.
2. Salek RM, Maguire ML, Bentley E, Rubtsov DV, Hough T, et al. (2007) A metabolomic comparison of urinary changes in type 2 diabetes in mouse, rat, and human. *Physiol Genomics* 29: 99-108.
3. Ellis BA, Poynten A, Lowy AJ, Furler SM, Chisholm DJ, et al. (2000) Long-chain acyl-CoA esters as indicators of lipid metabolism and insulin sensitivity in rat and human muscle. *Am J Physiol Endocrinol Metab* 279: E554-560.
4. Ye JM, Doyle PJ, Iglesias MA, Watson DG, Cooney GJ, et al. (2001) Peroxisome proliferator-activated receptor (PPAR)-alpha activation lowers muscle lipids and improves insulin sensitivity in high fat-fed rats: comparison with PPAR-gamma activation. *Diabetes* 50: 411-417.
5. Chavez JA, Summers SA (2003) Characterizing the effects of saturated fatty acids on insulin signaling and ceramide and diacylglycerol accumulation in 3T3-L1 adipocytes and C2C12 myotubes. *Arch Biochem Biophys* 419: 101-109.
6. Neschen S, Morino K, Hammond LE, Zhang D, Liu ZX, et al. (2005) Prevention of hepatic steatosis and hepatic insulin resistance in mitochondrial acyl-CoA:glycerol-sn-3-phosphate acyltransferase 1 knockout mice. *Cell Metab* 2: 55-65.
7. Yu C, Chen Y, Cline GW, Zhang D, Zong H, et al. (2002) Mechanism by which fatty acids inhibit insulin activation of insulin receptor substrate-1 (IRS-1)-associated phosphatidylinositol 3-kinase activity in muscle. *J Biol Chem* 277: 50230-50236.
8. Holland WL, Brozinick JT, Wang LP, Hawkins ED, Sargent KM, et al. (2007) Inhibition of ceramide synthesis ameliorates glucocorticoid-, saturated-fat-, and obesity-induced insulin resistance. *Cell Metab* 5: 167-179.
